# Supplementary material for: SPR-Enhanced Fluorescence of Solid Organic Dye Films
Source: Hindawi journal article supplement (doi:10.1155/2018/5268458), 2018-08-23
Supplement: f1 [file 5268458.f1.pdf]

## Supporting information

### SPR-Enhanced Fluorescence of Solid Organic Dye Films

Qing Fu<sup>1</sup>, Xiaolin Zhang<sup>1</sup>, Peipei Yan<sup>1</sup>, Shichao Wang<sup>1</sup>, Xinzhi Wang<sup>1</sup>, Yao Wang<sup>1</sup>, Linjun Huang<sup>1</sup>,  
Yanxin Wang<sup>1</sup>, Haiyan Liu<sup>1</sup>, Laurence A. Belfiore<sup>2, \*</sup>, Jianguo Tang<sup>1, \*</sup>

<sup>1</sup>Institute of Hybrid Materials, National Center of International Research for Hybrid Materials Technology, National Base of International Science & Technology Cooperation, College of Materials Science and Engineering, Qingdao University, Qingdao, 266071, P. R. China

<sup>2</sup>Department of Chemical and Biological Engineering, Colorado State University, Fort Collins, Colorado 80523 USA

\* Corresponding author: Jianguo Tang ([tang@qdu.edu.cn](mailto:tang@qdu.edu.cn));

Tel. : +86 532 85951519 Fax: +86 532 85951519

Laurence A. Belfiore ([belfiore@engr.colostate.edu](mailto:belfiore@engr.colostate.edu))

Tel.: +01 970 4915395 Fax: +01 970 4915395

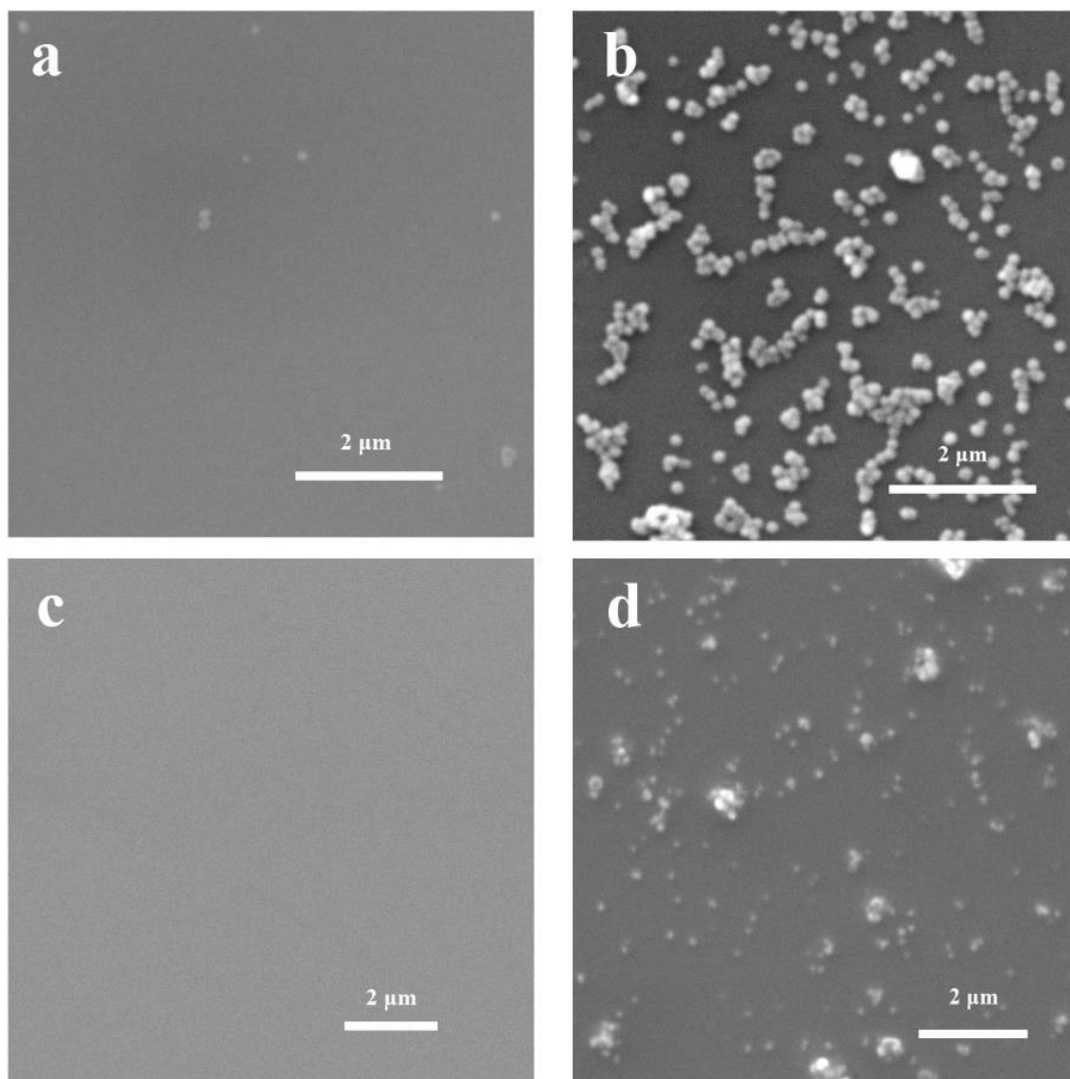

Fig. S1 SEM images of spin-coated films (**a.** Ag, **b.** Ag@SiO<sub>2</sub>, **c.** RB, **d.** Ag@SiO<sub>2</sub>@RB).

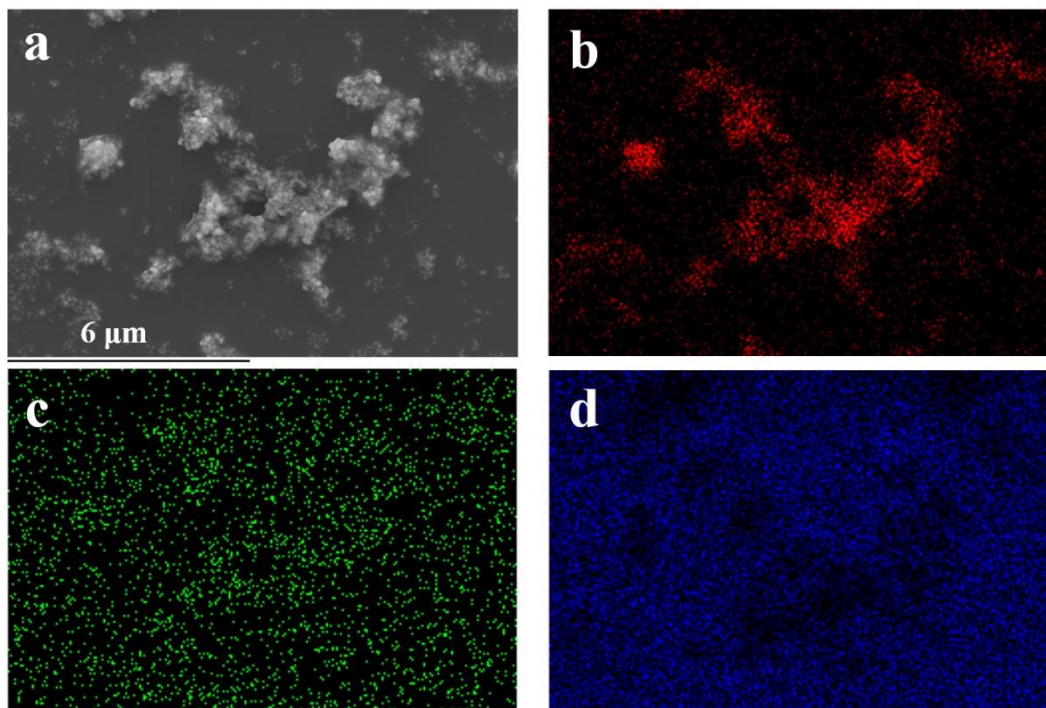

Fig. S2 EDX of Ag@SiO<sub>2</sub>@RB film. (a) is the original SEM image, (b) is the distribution of silver element, (c) is the distribution of nitrogen element, and (d) is the distribution of carbon element.

Fig. S2 are the distribution of silver (b) elements, nitrogen (c) elements and carbon (d) elements. The silver elements represent the Ag@SiO<sub>2</sub> particles, and the particles spread densely, corresponding to Fig. 3 and Fig. S1, due to the fact that RB molecular contains nitrogen elements, nitrogen elements (mainly in RB) distribution represents RB molecules, and carbon elements are belonging to organic materials (RB and thickening agent). The EDX images reveal the distribution of the components in Ag@SiO<sub>2</sub>@RB film.
